# Supplementary material for: CPAP delivered outside critical care during the second wave of COVID-19: outcomes from a UK respiratory surge unit
Source: HighWire-hosted journal article supplement (doi:10.1136/bmjresp-2021-000907), 2021-09-01

## Supplement Material: CPAP in COVID Weaning Guide

- ✓ **Note this a guide only and does not replace clinical judgement**
- ✓ **General principle: wean oxygen before PEEP**
- ✓ **Avoid formal wean plan until patient been on CPAP for at least 36 hours**
- ✓ **If requiring 15LNRB off CPAP to maintain SpO<sub>2</sub>, breaks should be a max 1 hour with meals/drinks & Max 30 mins in first 36 hours on CPAP**
- ✓ **Needs to tolerate (maintains target spo<sub>2</sub>) breaks on 60% via FM before formal weaning starts**
- ✓ **Aim to wean to wall oxygen if is PEEP 7.5 (or PEEP 10 in those with very high BMI)**
- ✓ **Avoid formal weans in those with RR > 25**

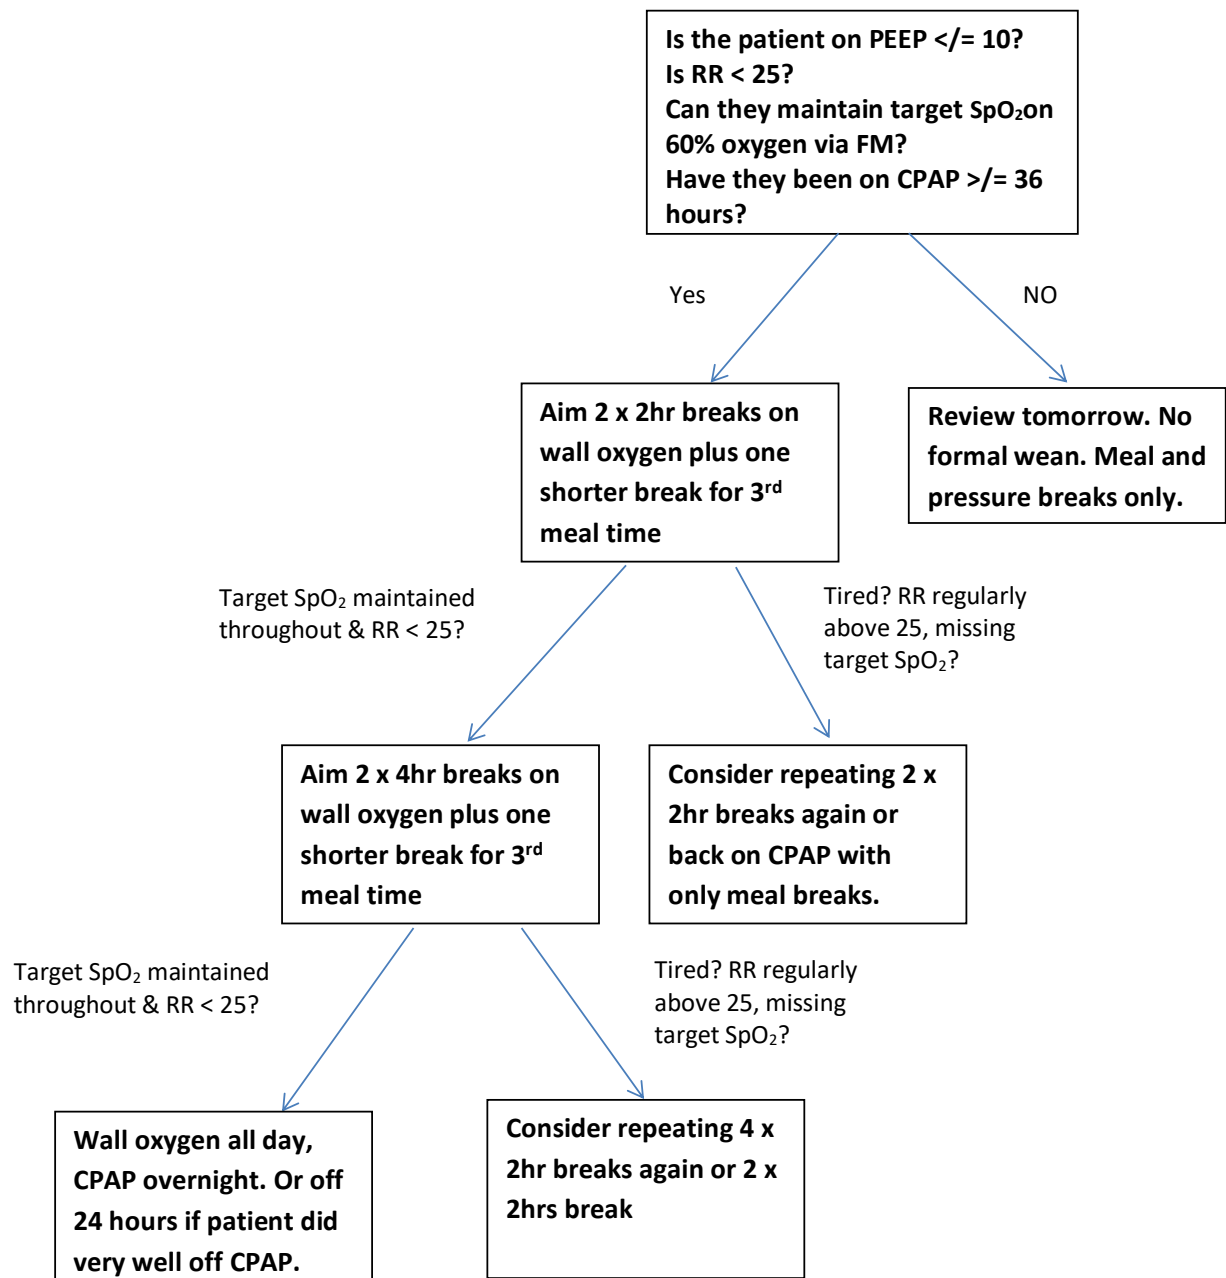

Supplement: bmjresp-2021-000907supp001_data_supplement.pdf [file bmjresp-2021-000907supp001_data_supplement.pdf]
